# Supplementary material
Source: PubMed Central journal article supplement (PMC5576784)
Supplement: pnas.1700475114.sapp.pdf [file pnas.1700475114.sapp.pdf]

# Supporting Information

## SI Materials and Methods

**Animals.** C75BL/6J, C3H/HeJ and nude mice were used in this study. K14-GFP, Pdgfra-EGFP, Sox2-EGFP, and FVB-GFP mice lines were purchased from Jackson laboratory. K14-GFP/Lef1-RFP mouse were kindly gifted from Dr. Elaine Fuchs laboratory. All procedures were performed upon approval of USC IACUC.

**Alkaline Phosphatase Staining.** Cell cultures were washed twice with PBS, fixed with 4% paraformaldehyde (PFA) at 4°C for 1h, and developed with BCIP (5-bromo-4-chloro-3-indolyl-phosphate) in conjunction with NBT (nitro blue tetrazolium, Bio-Rad, Richmond, CA) in the dark at room temperature for 10 min. After washing with PBS, the stained samples were imaged under a phase-contrast microscope.

## Hematoxylin and eosin (H&E) staining, Immunofluorescence, and in Situ Hybridization

Cell cultures for H&E staining, immunofluorescence staining, in situ hybridization and TUNEL staining were fixed in DEPC-treated 4% PFA buffer at 4°C overnight. Paraffin-embedded tissue was cut into 8µm sections.

For H&E staining, the sections were incubated with hematoxylin and eosin for 2 min, respectively at room temperature, dehydrated with ethanol and mounted with resinene.

For immunofluorescence staining, the samples were dewaxed and rehydrated, and retrieved with 10 mM sodium citrate buffer (pH 6.0) at 100°C for 10 min. Then the samples were blocked with 1% bovine serum albumin (BSA) buffer for 1h, incubated with primary antibodies (Table S2) at 4°C overnight and secondary antibodies conjugated with Alexa 488 or 594, respectively (1:1000, Life

Technologies) at 37 °C for 2 h. Samples were washed, counterstained with propidium iodide (PI) or 4'6'-diamidino-2-phenylindole (DAPI) and mounted with glycerol. Images were taken under a LSM 510 meta confocal microscope (USC Center for Liver Diseases).

For in situ hybridization, the sections were dewaxed and rehydrated, incubated with 1.5ug/ml proteinase K in PBT at 37°C for 20 min, then washed with PBT, acetylated with 0.25% acetic anhydride / triethanolamine, dehydrated with a graded ethanol series. The slides were put into a moisture chamber, added with 200ul hybridization solution, covered with a plastic coverslip and incubated at 65°C overnight. After washing with SSC and MBST buffer, the samples were incubated with Anti-Dig-AP conjugated antibody at 4°C overnight, washed with NTMT, developed with NBT/BCIP (Roche) buffer, counterstained with eosin and mounted with resinene. The sequences of oligonucleotides used for probe production are listed in Table S3.

**TUNEL Staining.** Paraffin-embedded tissue was cut into 8um sections. “*In situ* Keratinocyte Death Detection Kit” (Roche Diagnostics, Basel, Switzerland) was used for TUNEL staining(1). After dewaxing and rehydration, the sections were incubated with 20ug/ml proteinase K in 10mM Tris 7.5 and 5 mM EDTA for 15 min at room temperature. Then the sections were rinsed with PBS and 50ul TUNEL reaction cocktail was added. They were then incubated in a humidified chamber for 1 hour at 37°C in the dark. The samples were then counterstained with PI and mounted with glycerol.

**Small Molecules Perturbation and Recombinant Protein Treatment.** Libraries of small molecule inhibitors were a gift from Dr. Qing Liu and Dr. Justin Ichida at the USC CIRM Center. Small molecules or recombinant proteins at different concentrations were added into the culture medium. For live-imaging study, small molecules are added 3 hours before filming. Names, catalog number and concentrations of small molecules are listed in Table S4. After treatment with small molecules or

recombinant proteins, the samples were cut into sections at 8 $\mu$ m, and stained with K14 or other antibodies to visualize phenotypic alterations, such as changes in aggregate size, coalescence and planarization. Aggregate cell numbers were counted using Imaris software. Length of the differentiated aggregate region was measured with a ruler in Adobe Photoshop CS3. The aggregate coalescence rate was counted in 20 whole-mount images at 10X magnification.

**RNA-seq Preparation and Sequencing.** RNA-seq was performed on replicate samples from different culture time points. For all samples, RNA was extracted using TRIzol reagent (Invitrogen) from combined epidermal and dermal cells. 5  $\mu$ g total RNA from each sample was used to prepare the RNA-seq libraries using TruSeq RNA sample preparation v2 kit (Illumina). The libraries were sequenced by Hi-seq 2000 at the University of Southern California Epigenome Center. RNA-seq raw data were accessible at NCBI GEO (accession number: GSE86955).

**Transcriptome Analyses.** The mouse mm9 reference genome, and RefSeq genome annotation downloaded from the UCSC Genome Browser were used for RNA-Seq analysis(2). The alignment, quantification, normalization, and differentially expression analysis were performed by STAR 2.4.1d (3), HTSeq-count 0.6.0 (4), TMM (5), and edgeR 3.10.5 (6), respectively. False discovery rate < 0.05 was set as a threshold to identify differentially expressed genes. The principal component analysis (PCA), hierarchical clustering, and Venn diagrams were carried out by Partek Genomics Suite 6.15.1207 (Partek Inc.). DAVID 6.7 was run for gene set enrichment analysis (7). The top enriched pathways from “Gene ontology” and “Pathways” with the significant p-value ( $p < 0.05$ ) were presented in Table S1. Genes with detectable RPKM (Reads Per Kilobases per Million reads) value (usually larger than 25) were selected to do further expression study. We chose some of genes involved in the top enriched pathways that have differential expression between different time points to do functional study. In addition, the phenotypes observed in the morphological transition processes were also

matched with functional annotations, to target the potential genes or pathways in these highly enriched pathways for further studies.

**Transplantation.** Cell cultures from different culture conditions or treatments (Fig. 1, 6 and SI Appendix, Fig. S2, 7 and 8) were transplanted onto the dorsum of nude mice to test the hair forming efficiency according to our previously developed planar hair forming assay (8). For the reconstitution assay, we found there is no significant difference of the self-organization process if we use different numbers of newborn mouse cells in a droplet. Because of harder availability of adult cells, we used different numbers of cells from adult and newborn mice for doing reconstitution assay. Usually we use  $5 \times 10^6$  epidermal cells and  $4.5 \times 10^7$  dermal cells in one droplet for newborn cell culture. We use  $2 \times 10^6$  epidermal cells and  $1.8 \times 10^7$  dermal cells for adult cell culture. After transplantation, five  $1\text{mm}^2$  areas with regenerated hair follicles were counted and then averaged. Total regenerative area was measured. In our experience, the regenerative area is about  $0.5\text{ cm}^2$  from newborn cell culture grafts, and  $0.2\text{ cm}^2$  from adult cell culture grafts. Nine replicates were used.

**Cell sorting.** Dorsal skins from neonatal K14-H2BGFP and Pdgfra-EGFP mice were dissected and treated overnight with 0.025% trypsin (Gibco) at  $4^\circ\text{C}$ , which separated the epidermis and dermis. The epidermis and dermis were further dissociated into single cells by treatment with 0.25% trypsin or 0.35% collagenase, respectively, for 30 min at  $37^\circ\text{C}$ . Then the epidermal cells from K14-H2BGFP and dermal cells from Pdgfra-EGFP mice were incubated with DAPI to exclude dead cells. Cell isolations were performed on cell sorters at the USC Flow Cytometry Core Facility. The isolated K14-GFP positive epidermal cells and Pdgfra-EGFP dermal cells were mixed in a ratio of 1:9 and cultured accordingly.

**Statistical analyses.** All experiments were repeated at least four times and the results were expressed as mean  $\pm$  SD. Statistical significance among experimental and control groups were evaluated using the Student's t test. A value of  $p < 0.05$  was considered as statistically significant. Errors in the raw cluster frequency counts were estimated as 10% based on the counting accuracy at which the data were collected. The errors in the cluster size distributions (Figs. 2F and S2G) were then calculated using standard error propagation, assuming independent errors in different size bins.

**Cell tracking analysis.** Epidermal cells were tracked using Imaris software, using the “Brownian” movement model, with a maximum displacement between frames of  $20\mu\text{m}$ . Tracked movies were visually inspected for tracking accuracy. The median velocity of all cells was removed for each frame to correct for drift.

We calculated the directional autocorrelation to see how quickly cells stray from their direction of movement (Fig. 2E). For comparison we also calculated the expected directional correlation (as if cells are choosing the angle of movement at in each frame randomly) from  $10^6$  randomly sampled angles in the intervals of  $\pm\pi/4$ ,  $\pm\pi/2$ , and  $\pm3\pi/4$ . Due to the fact the interframe interval of the video microscopy data varies slightly between data sets (due to different image stack heights), the lag for the correlation also varied. To visualize the data across multiple experiments, we therefore calculated the directional autocorrelation for each data set, then fitted a smooth surface over the scattered pooled data using bicubic interpolation (using the Matlab file exchange function RegularizeData3D with smoothness parameter  $10^{-4}$ ).

**Mathematical modelling.** The Smoluchowski coagulation equations (9) describe the change in the distribution of irreversibly aggregating particles in space and time. We restrict ourselves to the well-mixed case, where the number,  $n_s$ , of clusters of size  $s$  evolves according to:

$$\frac{dn_s(t)}{dt} = \frac{1}{2} \sum_{i=1}^{s-1} K_{i,s-i} n_i(t) n_{s-i}(t) - \sum_{i=1}^{\infty} K_{s,i} n_s(t) n_i(t)$$

Here,  $K_{i,j}$  is the kinetic kernel (or coagulation kernel) that gives the rate at which clusters of size  $i$  and  $j$  aggregate. This rate is proportional to the size and motility of the aggregates (Fig. S3F).

To fit the above equation to data, we used monodisperse (dissociated single-cells) initial conditions. To numerically approximate solution of the equations for infinite cluster sizes, we checked convergence of the numerical solutions for cluster sizes of up to 400 cells (the range spanned by the data) by including additional (unobserved) cluster sizes in our equations until convergence was satisfactory.

**Scaling analysis.** We investigated whether clustering epidermal cells have the same scaling behavior as the hypothesized aggregation process, and thus whether they belong to the universality class of “clustering of clusters” (10, 11). In this process, diffusing (or otherwise moving) particles merge into particles of larger size upon contact, and these larger particles continue to move and merge upon contact with further particles. This class of models exhibits scale invariance, meaning that we should be able to describe the dynamics fully (at a coarse level) by the change in the average cluster size over time. To rescale the cluster size distribution, we divided the cluster size by the mean cluster size at a given time (Fig. S3G). When rescaling the argument of the distribution function in this way, we need to multiply by the average cluster size to conserve overall probability normalization.

### Supplementary References

1. Lei M, *et al.* (2012) Gsdma3 is a new factor needed for TNF-alpha-mediated apoptosis signal pathway in mouse skin keratinocytes. *Histochem Cell Biol* 138(3):385-396.
2. Rosenbloom KR, *et al.* (2015) The UCSC Genome Browser database: 2015 update. *Nucleic Acids Res* 43(Database issue):D670-681.
3. Dobin A, *et al.* (2013) STAR: ultrafast universal RNA-seq aligner. *Bioinformatics* 29(1):15-21.
4. Anders S, Pyl PT, & Huber W (2015) HTSeq--a Python framework to work with high-throughput sequencing data. *Bioinformatics* 31(2):166-169.

5. Robinson MD & Oshlack A (2010) A scaling normalization method for differential expression analysis of RNA-seq data. *Genome Biol* 11(3):R25.
6. Robinson MD & Smyth GK (2008) Small-sample estimation of negative binomial dispersion, with applications to SAGE data. *Biostatistics* 9(2):321-332.
7. Huang da W, Sherman BT, & Lempicki RA (2009) Systematic and integrative analysis of large gene lists using DAVID bioinformatics resources. *Nat Protoc* 4(1):44-57.
8. Lee LF, Jiang TX, Garner W, & Chuong CM (2011) A simplified procedure to reconstitute hair-producing skin. *Tissue Eng Part C Methods* 17(4):391-400.
9. Von Smoluchowski M (1916) Three discourses on diffusion, Brownian movements, and the coagulation of colloid particles. *Physikalische Zeitschrift der Sowjetunion* 17 557-571.
10. Botet R & Jullien R (1984) Size distribution of clusters in irreversible kinetic aggregation. *Journal of Physics A: Mathematical and General* 17(12):14.
11. Kolb M (1984) Unified Description of Static and Dynamic Scaling for Kinetic Cluster Formation. *Physical review letters* 53(17):4.

## Supplementary figures and legends

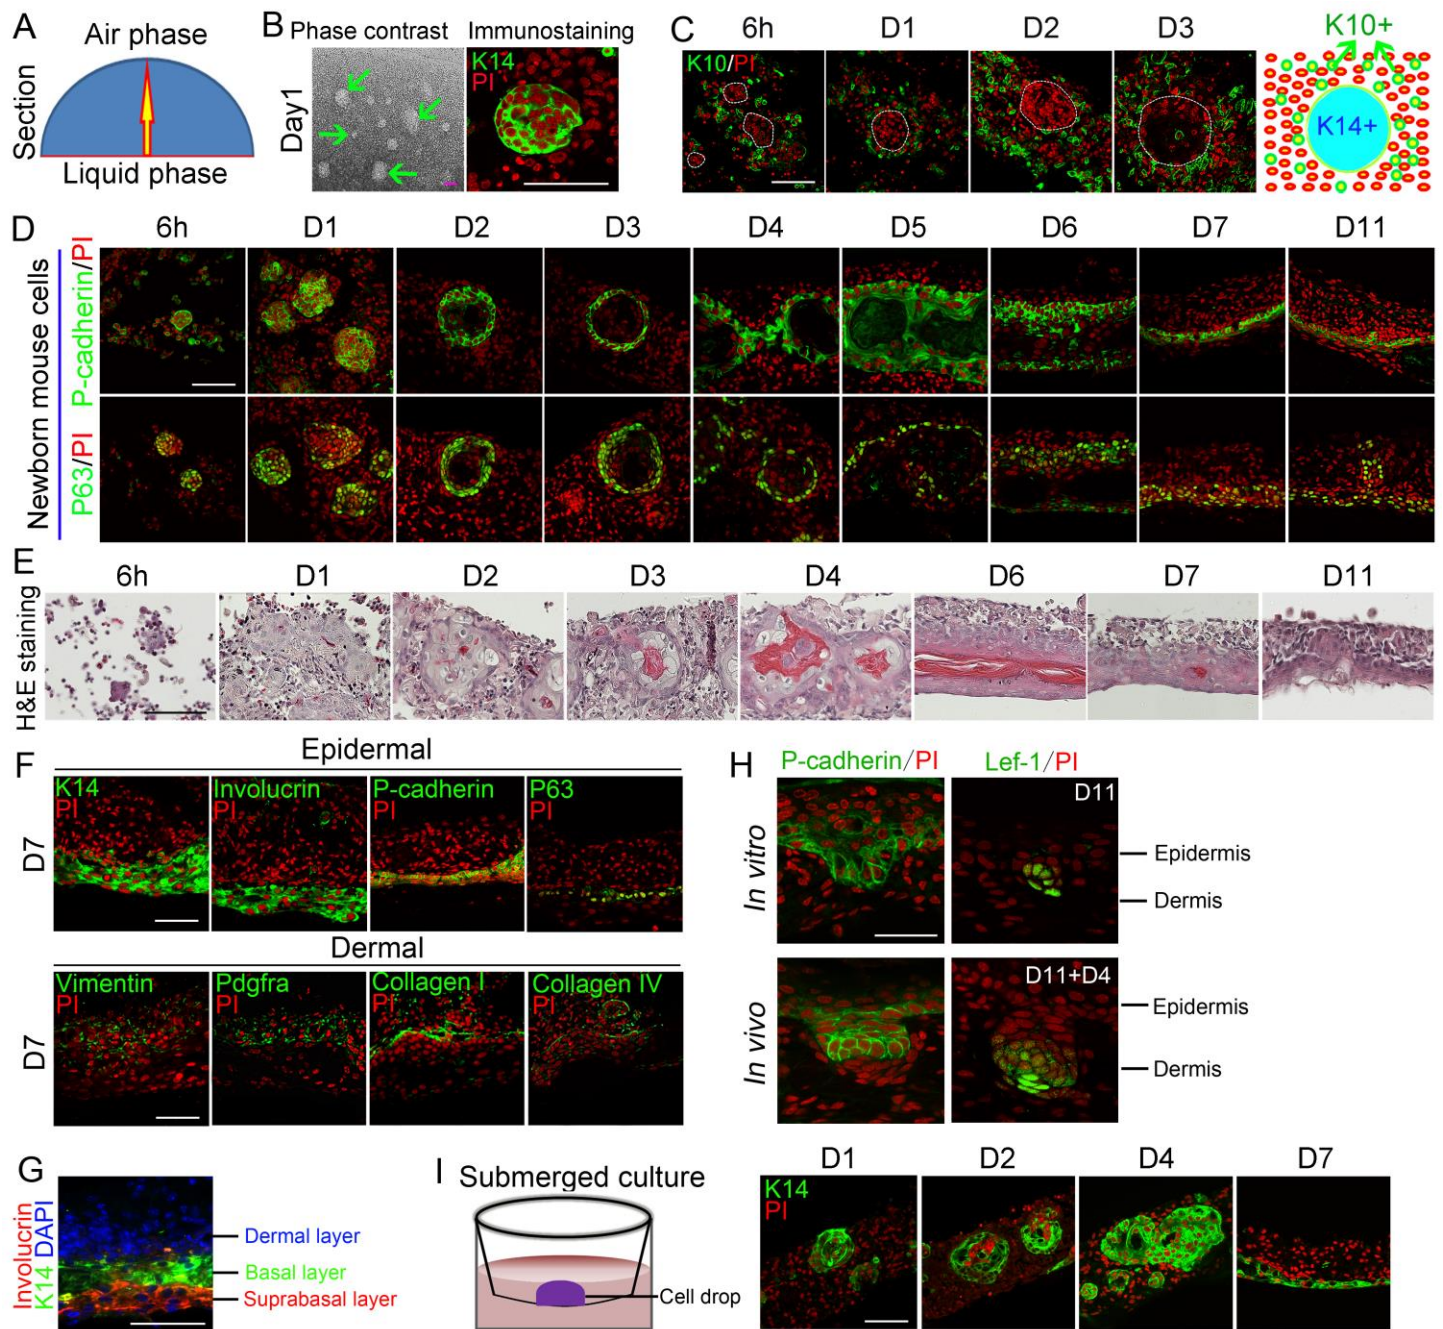

**Fig. S1.** The process of self-organization from dissociated cells to planar skin with hair placode-like structure formation. (A) All sections in the present study are cut in side view. (B) Phase-contrast microscope image shows white patches representing aggregates at day 1. Immunostaining shows all the cells in the aggregates are K14 positive, indicating they originated from basal epidermal cells. (C) K10+ suprabasal epidermal cells are not involved in aggregate formation. (D) Immunostaining for P-cadherin and P63 shows the stepwise self-organization processes of epidermal cells. (E) H&E



staining shows more time points of the skin progenitor cell self-organization process. (F) Markers for epidermal and dermal cells reveal formation of skin with epidermal and dermal components at day 7. (G) Immunostaining for Involucrin and K14 shows stratification of epidermis at day 10 in culture. (H) P-cadherin and Lef-1 immunostaining show hair placode and dermal condensation formation during skin reconstitution *in vitro* and *in vivo*. D11+ D4 represents cells are cultured for 11 days *in vitro* and 4 days after transplantation. (I) Self-organization of skin cells in submerged culture condition. Scale bars=50um, 100um.

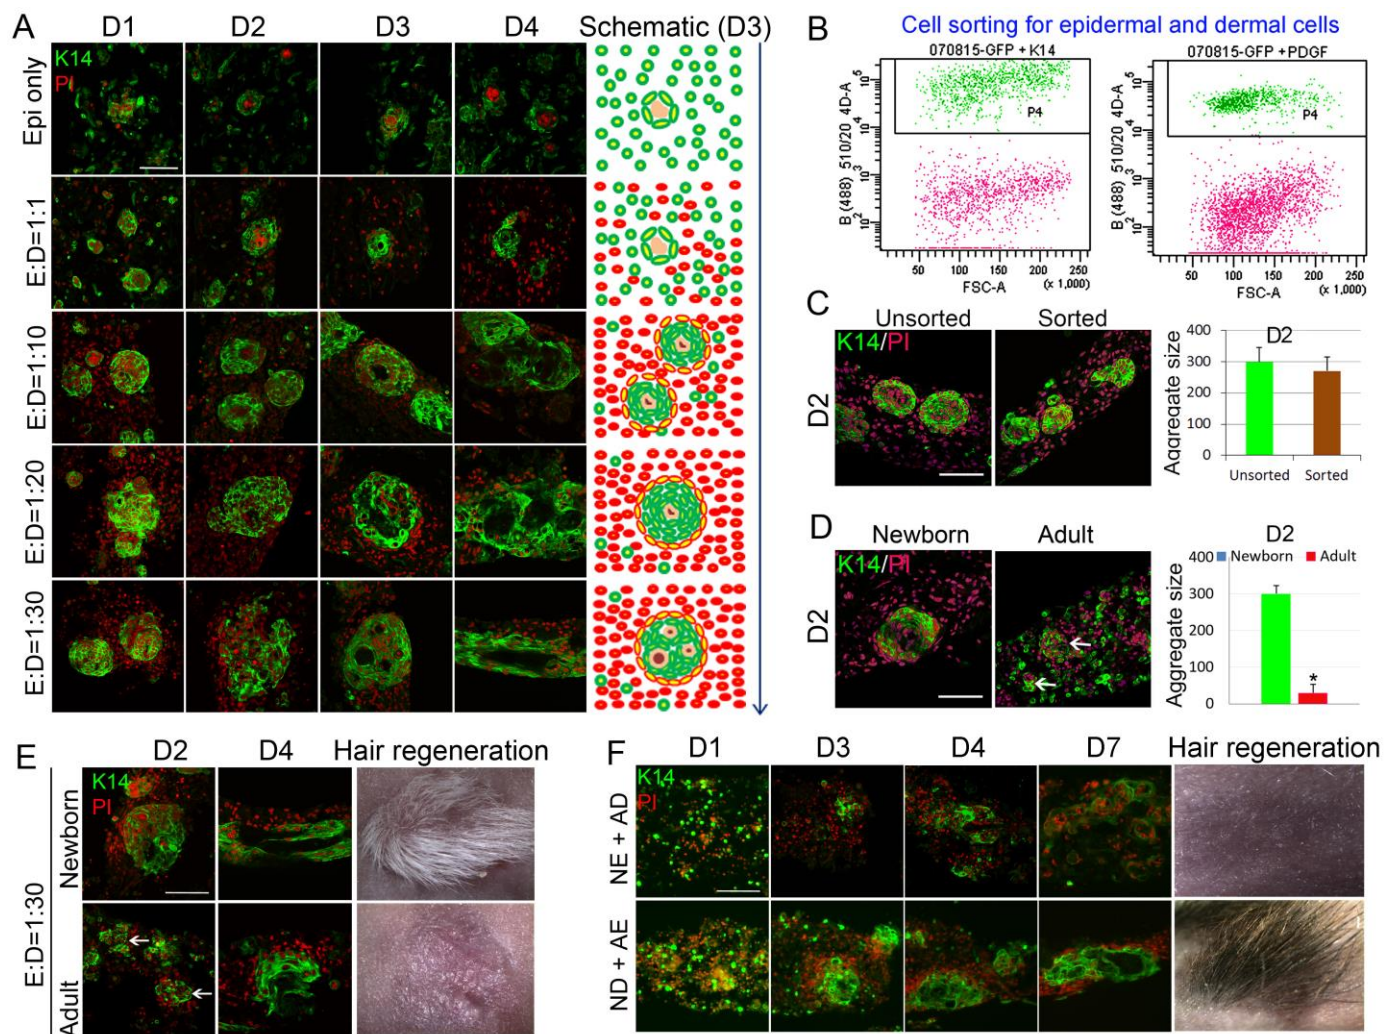

**Fig. S2.** (A) K14 immunostaining reveals higher ratios of epidermal: dermal cells result in smaller aggregate formation. (B) FACS sorting of epidermal and dermal cells using K14-GFP and Pdgfra-EGFP mouse lines, respectively. (C) Culture of FACS-sorted epidermal and dermal cells form smaller

aggregates at day 2, when compared to the control. (D) Immunostaining for K14 shows only small aggregates form when culturing cells from adult mice using the same method. (E) Adult cells that are cultured at 1:30 E:D ratio form larger aggregates when compared to those cultured at 1:9 E:D ratio (D) at day 2. The epidermal cells undergo terminal differentiation and fail to coalesce at day 4. The aggregates are smaller in size when compared to the newborn mouse cultures at 1:30 E:D ratio. The adult cells fail to regenerate hairs upon transplantation to the nude mice. (F) Recombination assay of newborn and adult cells. A, adult cells. N, newborn cells. Epi, E, epidermal cells. D, dermal cells. Scale bars=100um. Data are reported as average  $\pm$ SD, \*p < 0.05. n>100.

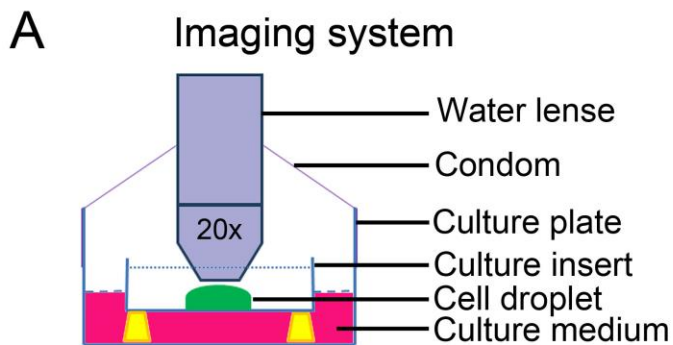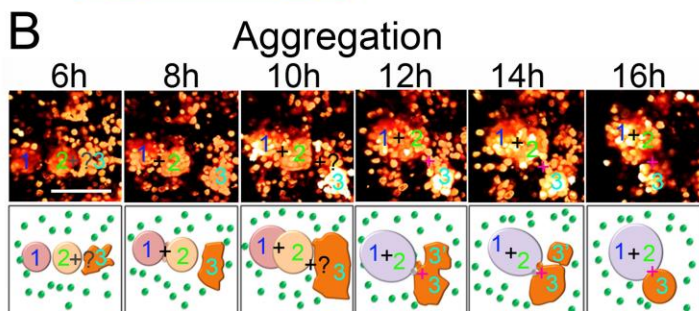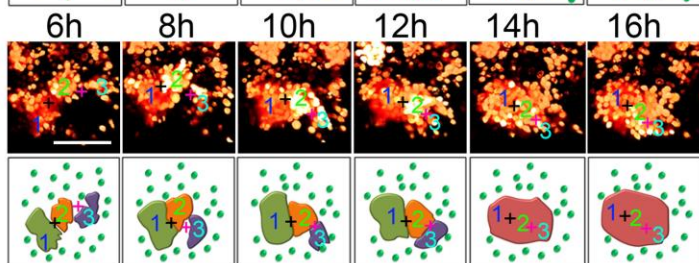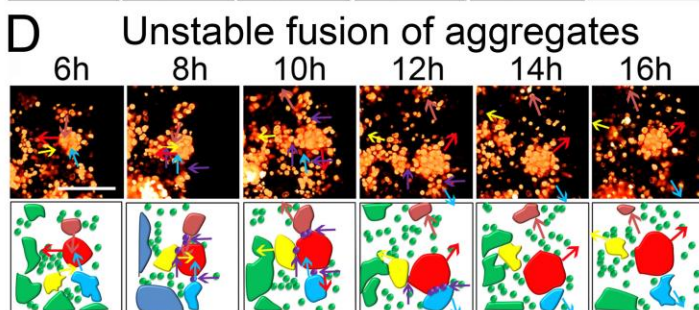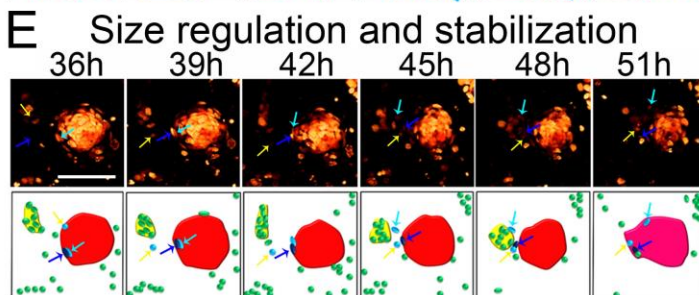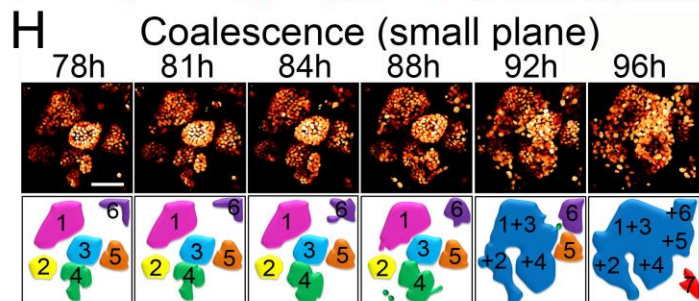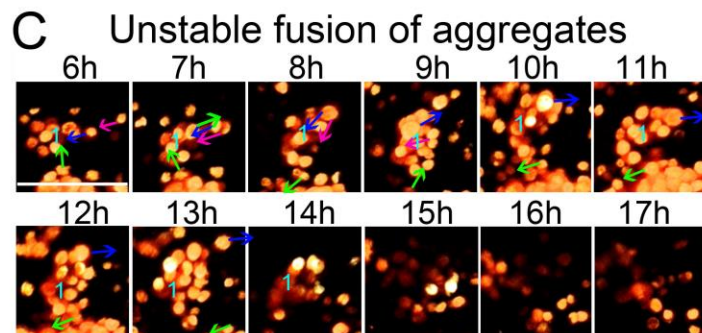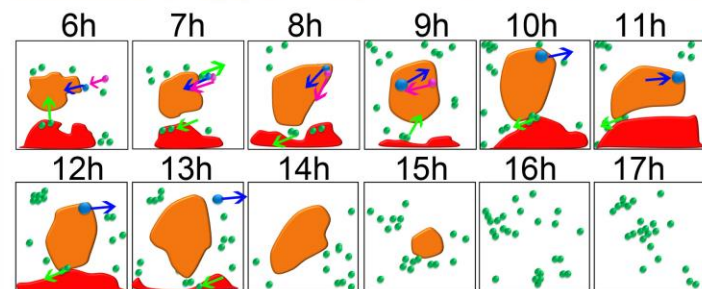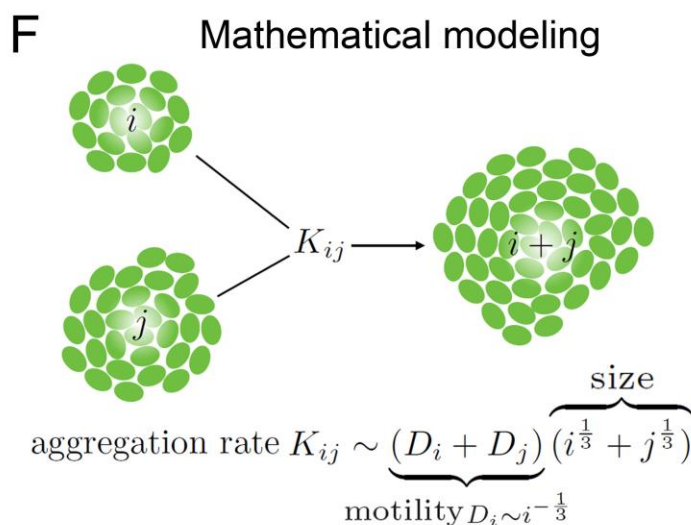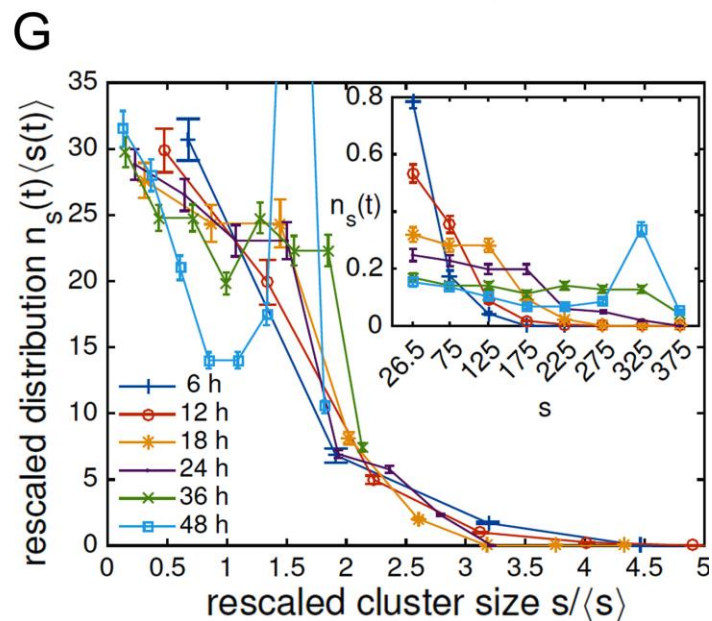

**Fig. S3.** Time lapse live-imaging shows cell behaviors of epidermal cells using a K14-GFP transgenic mouse line. (A) Time lapse live-imaging system setup. Condom membrane is used to prevent culture medium evaporation. (B) Aggregates merging. Scale bar, 100um. (C) Individual cells can enter and leave the aggregates. Scale bar, 100um. (D) Aggregates can form and disaggregate. Scale bar, 100um. (E) Cells can leave one aggregate and enter another aggregate, and then merge back to the original one. Scale bar, 100um. (F) Illustration of aggregation model. Epidermal clusters of size  $i$  and  $j$  aggregate with rate  $K_{ij}$ , which in turn depends on the cluster motility and size. (G) Epidermal cell cluster size distributions from the first 36 hours collapsed onto each other when rescaled by the average cluster size for each time-point, showing statistical self-similarity. Lack of collapse for the 48h curve indicates a change in the cluster growth dynamics. The unscaled data show no collapse (inset). (H) Aggregates that have close distance can merge together from day 3.5 to day 4. Scale bars=100um.  $n \geq 500$ .

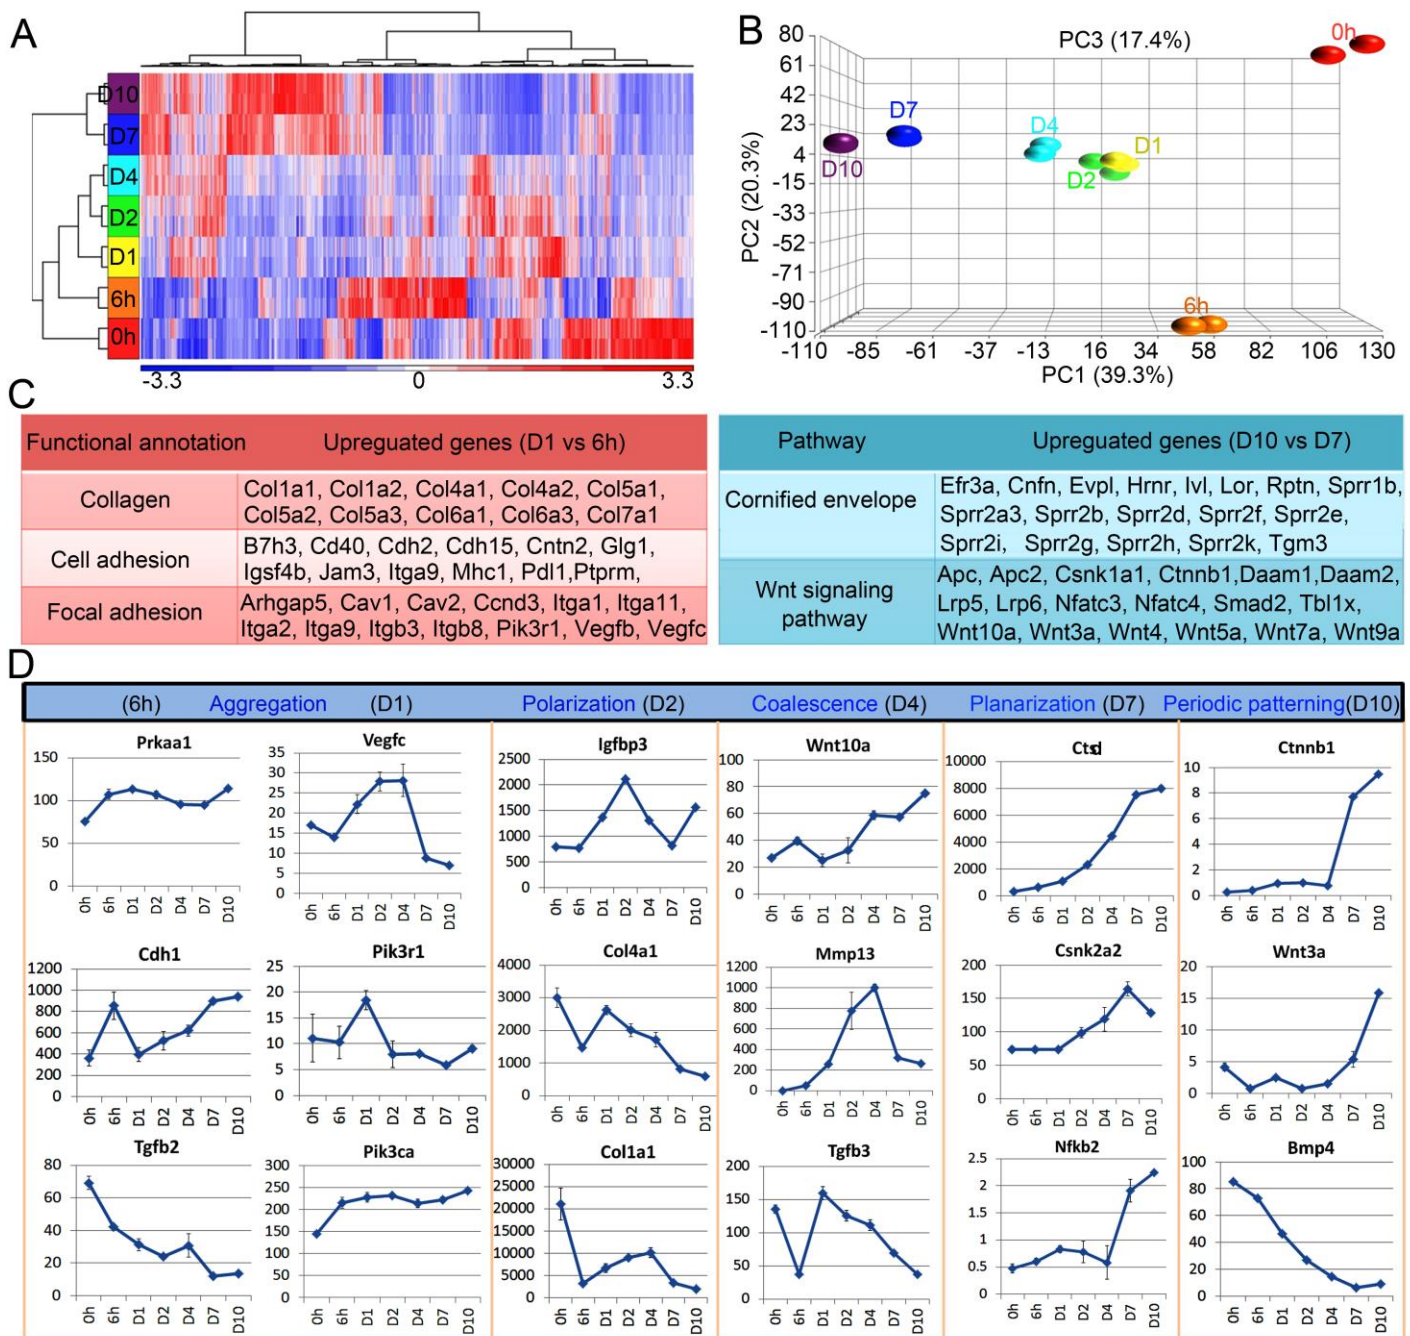

**Fig. S4.** RNA-seq profiling and bio-informatic analysis reveal key molecular events during self-organization process. (A) Hierarchical clustering shows genes that are dynamically expressed at different time points. (B) Principal component analysis (PCA) shows replicates cluster together. (C) Functional annotations show pathways and genes that are increased at different time points. (D) Exemplary genes that are dynamically expressed at different time points.

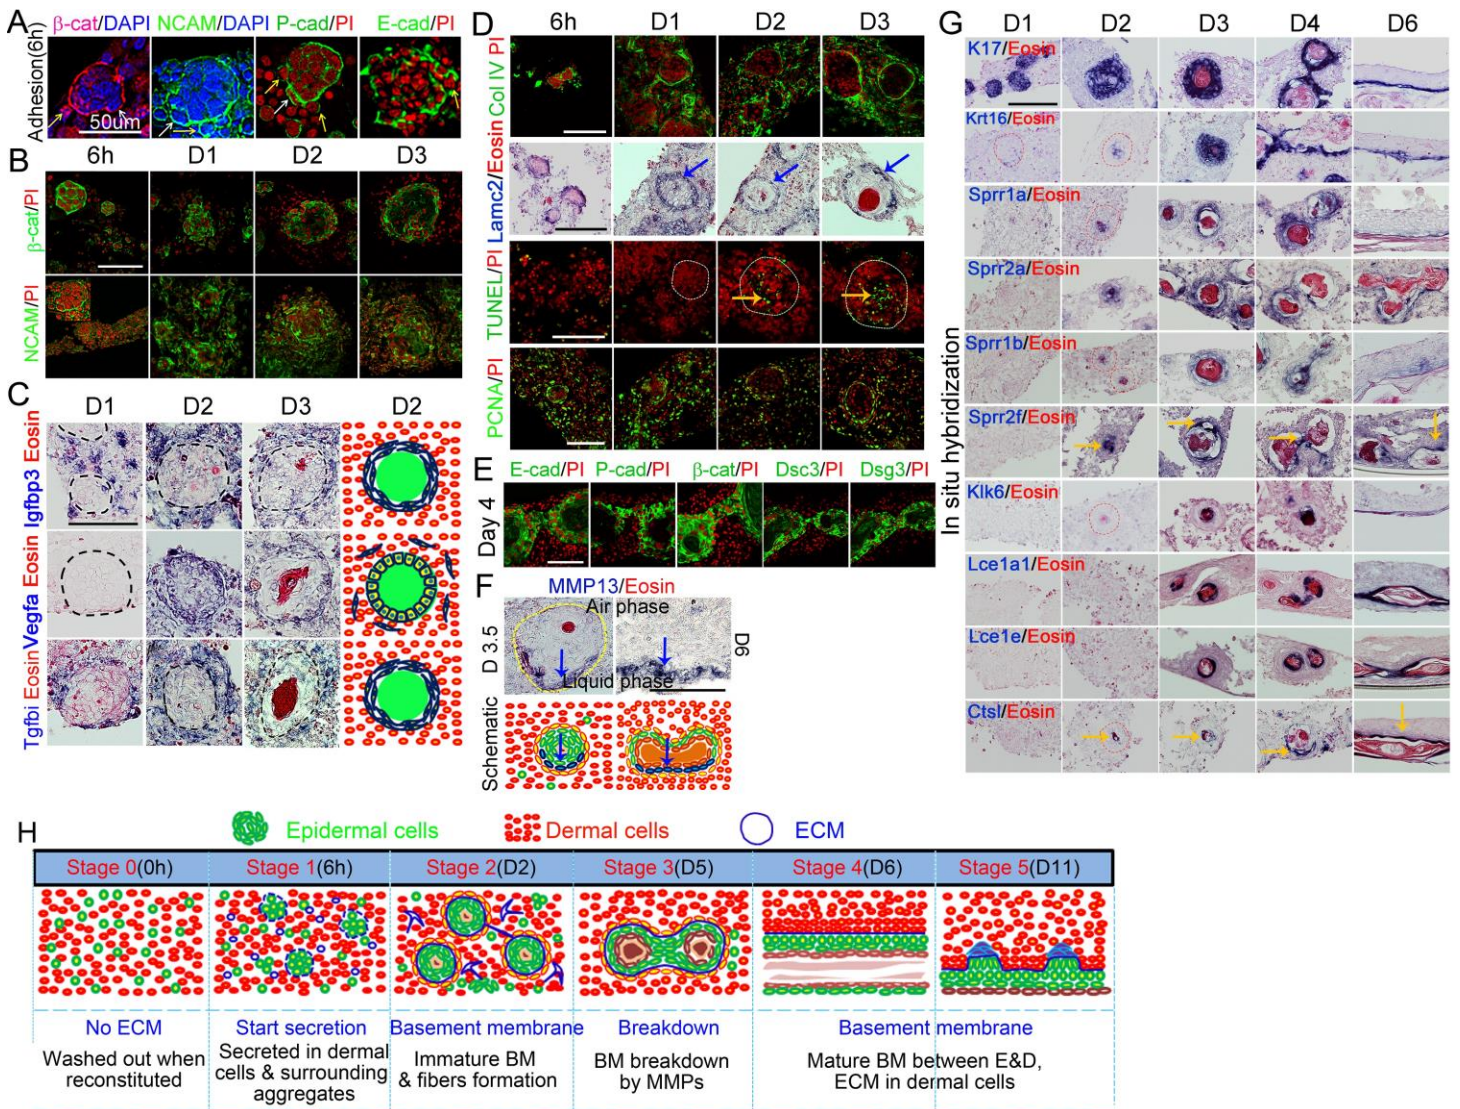

**Fig. S5.** Immunostaining and in situ show gene expression at different phases. (A). Immunostaining shows adhesion molecules including b-catenin, NCAM, P-cadherin and E-cadherin are highly expressed at 6h. (B) Immunostaining shows adhesion genes including b-catenin is expressed in epidermal aggregates, and Ncam is expressed higher in epidermal aggregates and lower in the dermal cell region. (C) In situ shows mRNA expression of different genes. IGFBP3 is expressed in the dermal cell region and becomes more intense surrounding the aggregates at day 2 and day 3. Vegfa appears in the dermal cell region and basal layer of the epidermal aggregate from day 2. Tgfbi is always expressed in the dermal cells surrounding the aggregates. (D) Immunostaining shows collagen type IV is expressed at the dermal region and form a basement membrane at day 2, which gets more mature at day 3. In situ hybridization shows Lamc2 is expressed at the border of the

aggregate, forming the basal layer. TUNEL staining shows more cell apoptosis in the center of the aggregate from day 2. PCNA staining shows cell proliferation in the outer part of the aggregates from day 2. (E) Immunostaining for epidermal cell markers shows an epidermal cell chain links two aggregates. (F) In situ hybridizations show *Mmp13* is preferentially expressed at the lower part of aggregates at day 3.5 day 6. (G) In situ shows mRNA expression of epidermal cell differentiation genes at different time points. (H) Schematic drawing shows ECM assembly during skin cell self-organization. Scale bars= 100um. n=9.

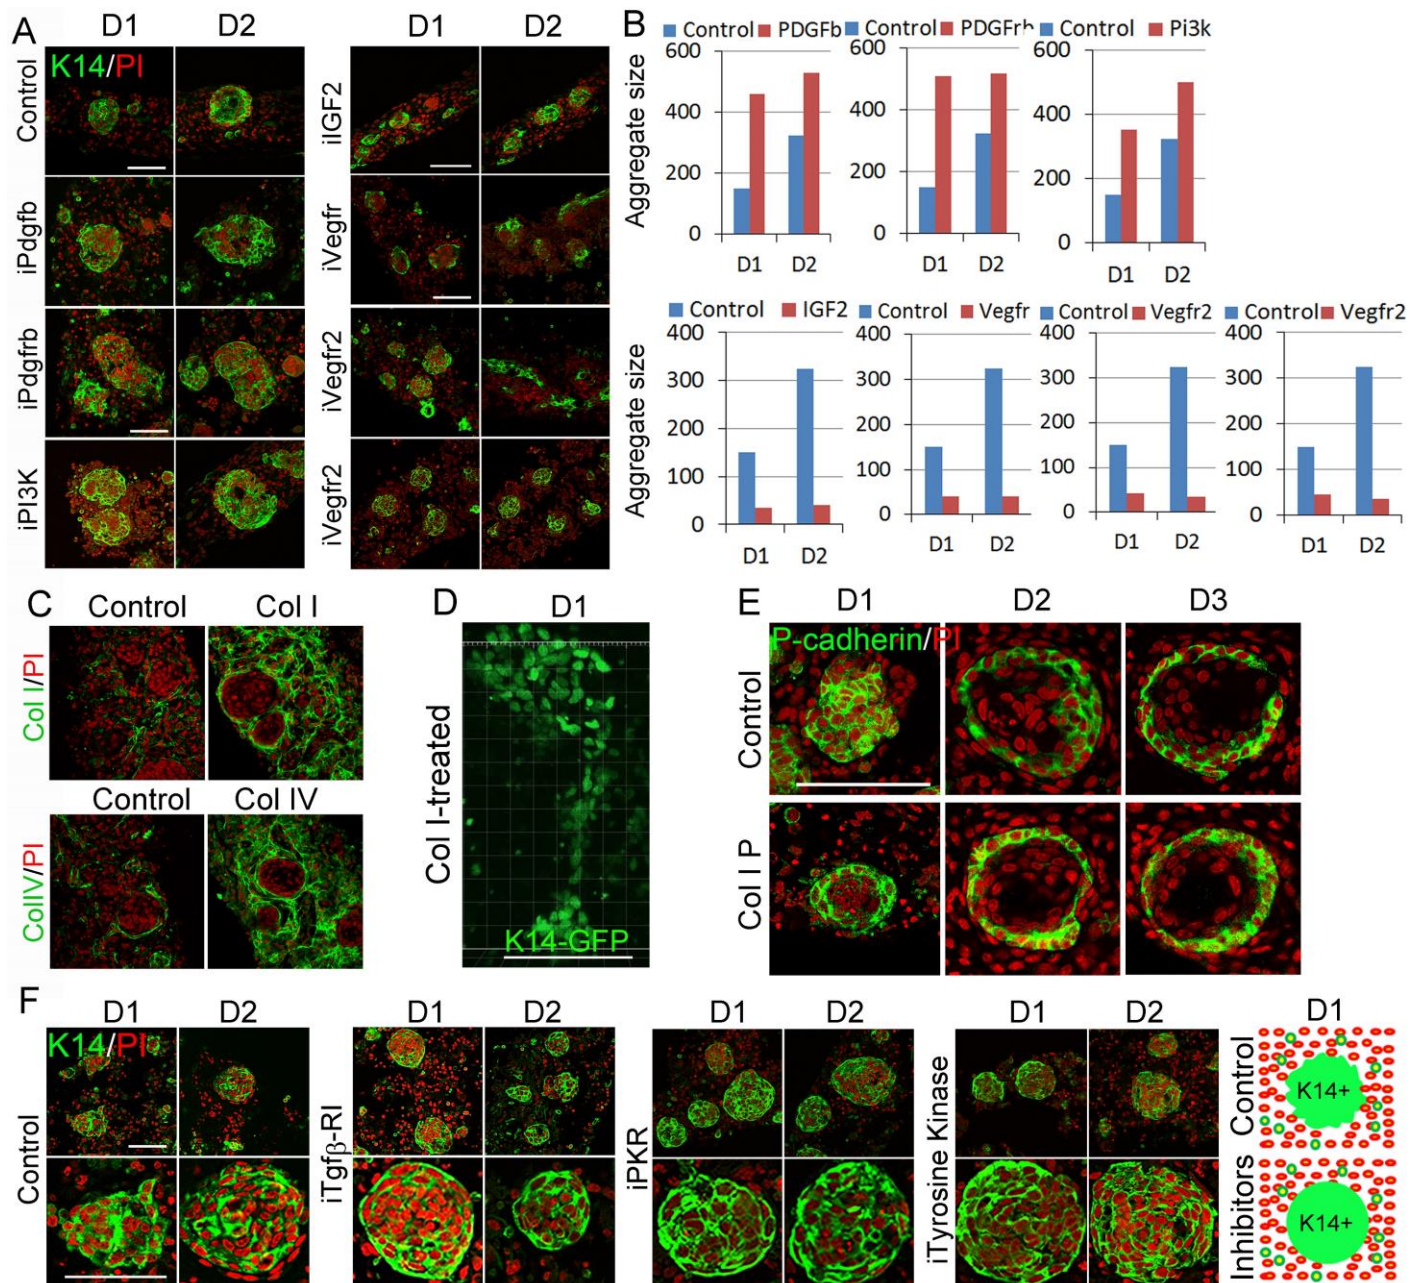

**Fig. S6.** Molecular mechanisms of the self-organization process from dissociated cells to polarized aggregates. (A) Immunostaining for K14 shows epidermal aggregates can grow larger when treated with small molecules that inhibit Pdgfb, Pdgfrb and PIK3, or grow smaller when treated with small molecules that inhibit IGF2 Vegfr, and Vegfr2. (B) Statistical analysis show the size of aggregates after the cultures are treated by small molecules inhibitors at day 1 and day 2. (C) Immunostaining shows expression of Collagen I and Collagen IV is increased after the cultures were treated by Collagen I and Collagen IV recombinant proteins. (D). Live-imaging analysis reveals long epidermal strand formation at day 1 after the culture was treated by Collagen I recombinant protein. Scale bar, 100um. (E). Immunostaining for P-cadherin shows over expressed Col I leads to premature polarization of the aggregates. (F). Smooth boarded aggregate formation at day 1 after the cultures were treated by small molecules that inhibit Tgfb-RI, PKR and Class III tyrosine Kinase. Scale bar, 100um. n=9.



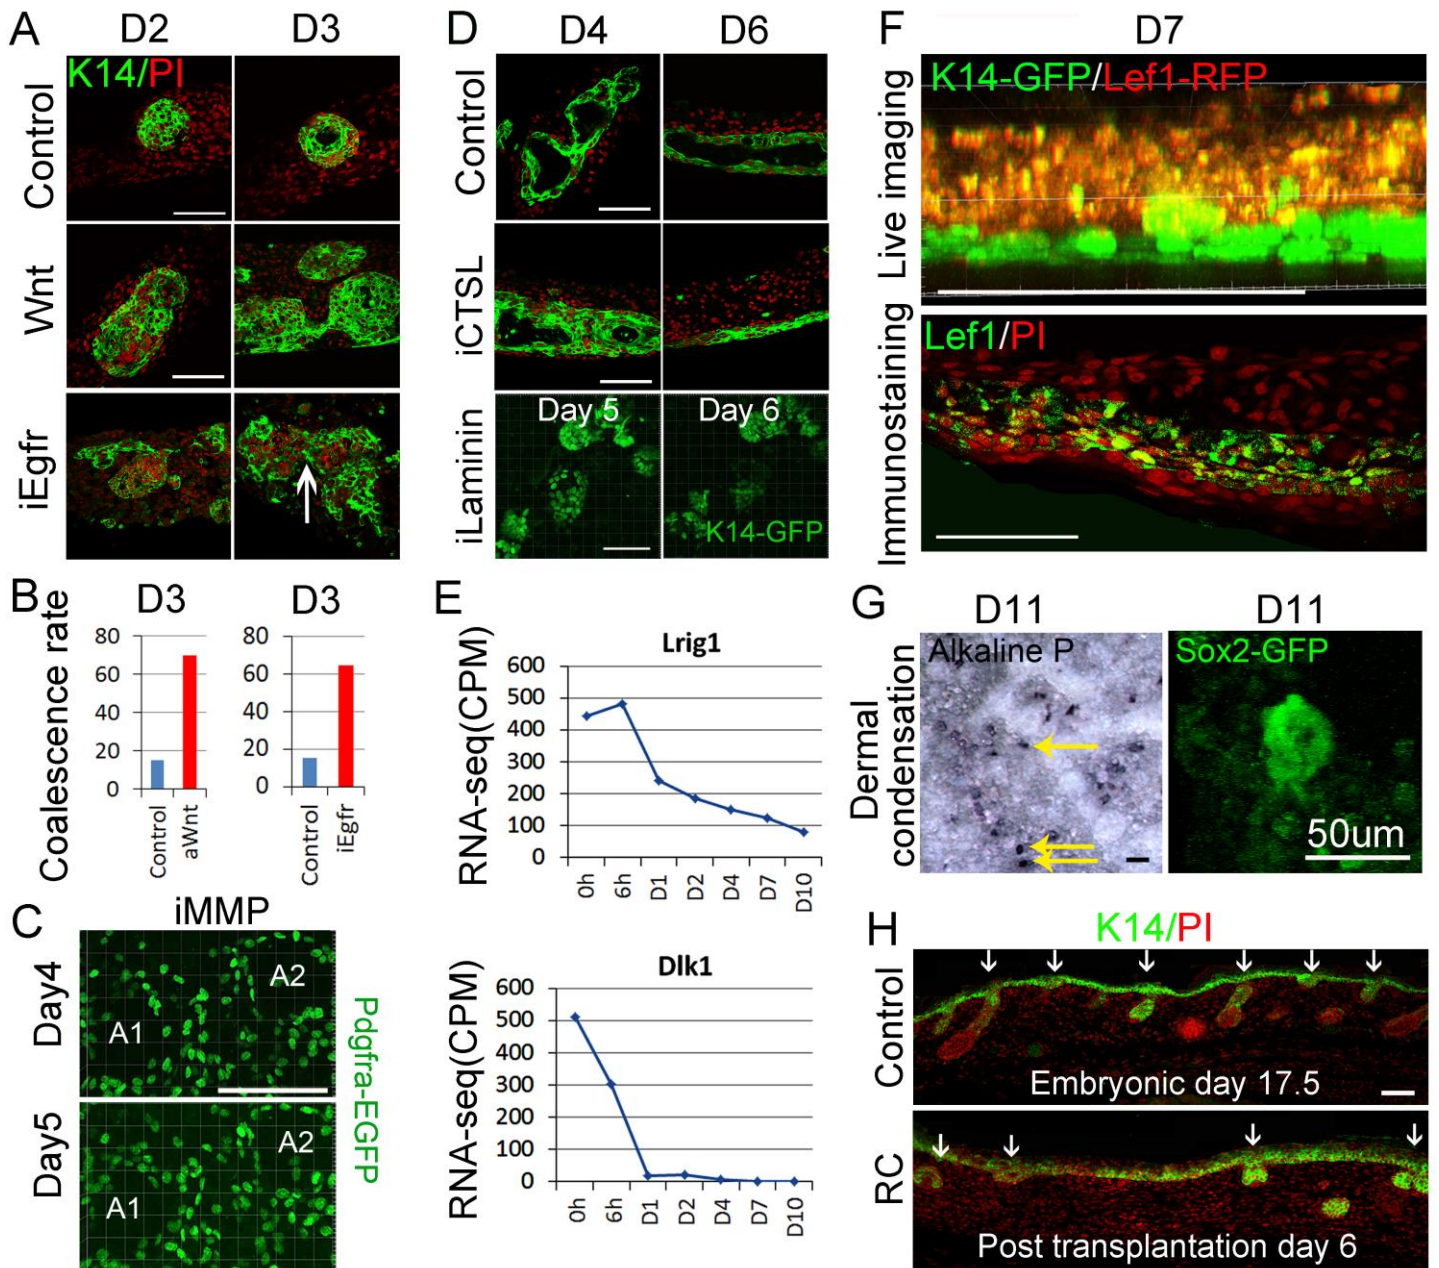

**Fig. S7.** Molecular mechanisms of the self-organization process from polarized aggregates to planar skin. (A-B) Immunostaining for K14 and related statistical analysis show coalescence of epidermal aggregates is accelerated at day 3 after the cultures are treated with Wnt agonist or small molecules that inhibit Egfr. (C) Live-imaging analysis of cellular behaviors of Pdgfra-EGFP+ cells reveals coalescence of epidermal aggregates is blocked after the culture is treated by small molecules that inhibit MMPs. (D) Immunostaining for K14 shows coalescence of epidermal aggregates at day 4 and planar skin formation at day 6. (E) RNA-seq reveals both Lrig1 and Dlk1 which represent papillary and reticular dermal cells, respectively, are decreased during culture. Lrig1 disappears at day 1 but Dlk1 is maintained at a certain level until day 10. CPM, counts per million. (F) Upper panel: 3D

rendering of cultured cells from K14-GFP/Lef1-RFP mouse line shows Lef1-positive cells are adjacent to K14+ basal epidermal cells at day 7. Lower panel: Immunostaining shows 3 to 4 layers of Lef1-positive cells are located beside the epidermal plane. (G) Alkaline phosphatase staining and Sox2-GFP positive cells show dermal condensates form at day 11. (H) Compared to the skin which produces organized hair germs in spacing at embryonic day 17.5, the reconstituted skin forms hair germs in a random distance. RC= reconstituted skin; Scale bars=100um, 50um.

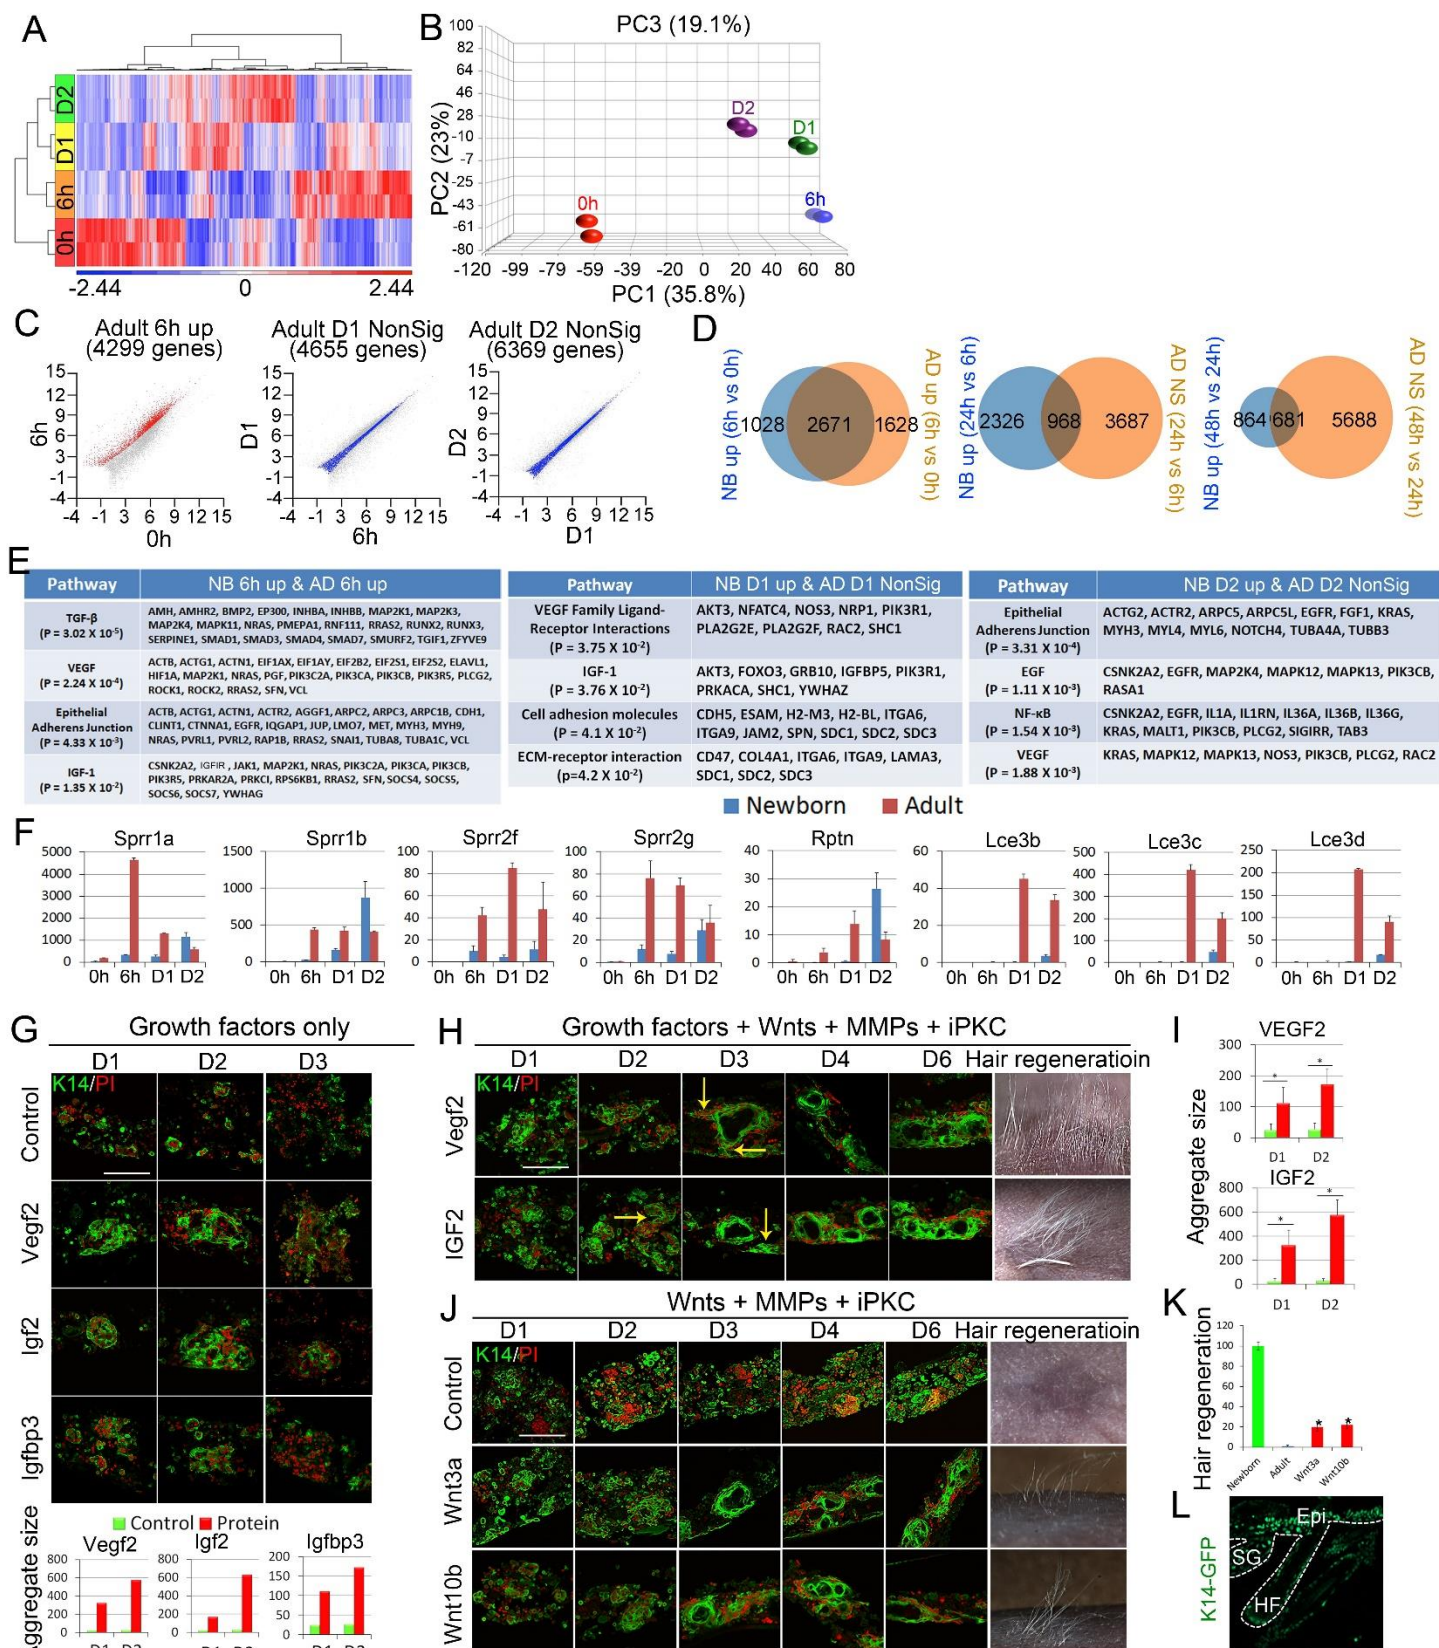

**Fig. S8.** Adult mice cells can be rescued to form hairs. (A) Hierarchical clustering shows genes that are dynamically expressed at different time points. (B) Principal component analysis (PCA) shows replicates cluster together. (C) RNA-seq data show three different groups of molecules are increased

at 6h or not significantly changed (NonSig) at day 1 and day 2. (D) Venn diagrams show the number of genes that are differentially expressed between newborn and adult mice cells at different time points. (E) Functional annotations show pathways and genes that are dynamically expressed at different time points. (F) EDC genes (e.g. Lce3b and Lce3c) are not highly expressed until day 7 in newborn cultures, but begin to increase at 6h in adult cultures. (G) Immunostaining for K14 shows aggregates can grow larger after the adult cell assays are treated with Vegf2, IGF2 and IGFBP3 recombinant proteins, but differentiate at day 3. (H-I) The self-organization process in newborn cell culture can take place in adult cell assays after they are sequentially treated with PKC inhibitors, recombinant proteins (VEGF2 and IGF2), Wnt recombinant proteins and MMPs. (J) Adult cell assays treated with Wnt3a or Wnt10b recombinant proteins from 0 h to day 4 can grow larger in size. (K) More hairs are regenerated when Wnts-treated adult cells are transplanted onto the back of nude mice. (L) K14-GFP shows the regenerated hair follicles are derived from donor cells. Epi, epidermis. SG, sebaceous gland. HF, hair follicle. Scale bars=100um. n=9. Data are reported as average  $\pm$ SD. \*P < 0.05.

## Supplemental Table S1 Gene ontology and pathways

Newborn mouse cells 6h vs 0h

| Term                                   | RT | Genes                                                                                 | Count | %   | P-Value  |
|----------------------------------------|----|---------------------------------------------------------------------------------------|-------|-----|----------|
| Cytokine-cytokine receptor interaction | RT |  | 68    | 2.5 | 1.20E-09 |
| Proteasome                             | RT |  | 21    | 0.8 | 6.10E-07 |
| Apoptosis                              | RT |  | 29    | 1.1 | 3.40E-06 |
| Jak-STAT signaling pathway             | RT |  | 41    | 1.5 | 9.20E-06 |
| p53 signaling pathway                  | RT |  | 22    | 0.8 | 1.40E-04 |
| Cell adhesion                          | RT |  | 23    | 0.8 | 2.20E-04 |
| Spliceosome                            | RT |  | 32    | 1.2 | 2.60E-04 |
| NOD-like receptor signaling pathway    | RT |  | 20    | 0.7 | 2.60E-04 |
| Insulin signaling pathway              | RT |  | 25    | 0.9 | 9.40E-03 |
| Tight junction                         | RT |  | 29    | 1.1 | 9.20E-03 |
| TGF-beta signaling pathway             | RT |  | 25    | 0.9 | 2.60E-04 |
| Regulation of actin cytoskeleton       | RT |  | 43    | 1.6 | 6.20E-03 |

## Newborn mouse cells D1 vs 6h

| Term                                       | RT | Genes                                                                               | Count | %   | P-Value  |
|--------------------------------------------|----|-------------------------------------------------------------------------------------|-------|-----|----------|
| cell adhesion                              | RT |  | 101   | 3.7 | 4.30E-11 |
| calcium                                    | RT |  | 165   | 6.1 | 5.20E-11 |
| ECM-receptor interaction                   | RT |  | 35    | 1.3 | 2.70E-10 |
| zymogen                                    | RT |  | 61    | 2.2 | 1.40E-09 |
| collagen                                   | RT |  | 34    | 1.3 | 5.60E-09 |
| Valine, leucine and isoleucine degradation | RT |  | 23    | 0.8 | 1.30E-08 |
| Focal adhesion                             | RT |  | 52    | 1.9 | 1.2E-06  |

## Newborn mouse cells D2 vs D1

| Term                                          | RT | Genes                                                                                 | Count | %    | P-Value  |
|-----------------------------------------------|----|---------------------------------------------------------------------------------------|-------|------|----------|
| ribosome                                      | RT |    | 47    | 3.3  | 1.10E-12 |
| extracellular region                          | RT |    | 190   | 13.5 | 3.60E-09 |
| proton-transporting V-type ATPase complex     | RT |    | 10    | 0.7  | 2.00E-06 |
| cornified envelope                            | RT |    | 10    | 0.7  | 3.60E-06 |
| extracellular region part                     | RT |    | 94    | 6.7  | 4.20E-06 |
| proton-transporting two-sector ATPase complex | RT |    | 14    | 1    | 7.90E-06 |
| extracellular matrix                          | RT |  | 43    | 3.1  | 1.40E-04 |
| proteinaceous extracellular matrix            | RT |  | 41    | 2.9  | 2.50E-04 |
| cytosolic ribosome                            | RT |  | 7     | 0.5  | 1.60E-03 |
| apical part of cell                           | RT |  | 21    | 1.5  | 3.10E-03 |
| extracellular space                           | RT |  | 56    | 4    | 4.80E-03 |
| myosin complex                                | RT |  | 12    | 0.9  | 5.50E-03 |
| cell-cell junction                            | RT |  | 24    | 1.7  | 5.70E-03 |
| apical plasma membrane                        | RT |  | 16    | 1.1  | 7.30E-03 |
| apical junction complex                       | RT |  | 16    | 1.1  | 8.70E-03 |
| apicolateral plasma membrane                  | RT |  | 16    | 1.1  | 1.00E-02 |
| organelle membrane                            | RT |  | 79    | 5.6  | 1.50E-02 |
| extracellular matrix part                     | RT |  | 14    | 1    | 2.10E-02 |
| endoplasmic reticulum                         | RT |  | 80    | 5.7  | 2.40E-02 |
| melanosome                                    | RT |  | 13    | 0.9  | 2.60E-02 |
| pigment granule                               | RT |  | 13    | 0.9  | 2.60E-02 |
| occluding junction                            | RT |  | 12    | 0.9  | 2.70E-02 |
| tight junction                                | RT |  | 12    | 0.9  | 2.70E-02 |
| VEGF signaling pathway                        | RT |  | 11    | 0.8  | 0.075    |
| Gap junction                                  | RT |  | 12    | 0.9  | 7.50E-02 |

## Newborn mouse cells D4 vs D2

| Term                                      | RT | Genes | Count | %   | P-Value  |
|-------------------------------------------|----|-------|-------|-----|----------|
| Lysosome                                  | RT |       | 34    | 2.9 | 2.80E-13 |
| Other glycan degradation                  | RT |       | 8     | 0.7 | 3.20E-05 |
| Glycosaminoglycan degradation             | RT |       | 8     | 0.7 | 4.60E-04 |
| Focal adhesion                            | RT |       | 26    | 2.2 | 9.90E-04 |
| Leukocyte transendothelial migration      | RT |       | 18    | 1.5 | 1.70E-03 |
| Regulation of actin cytoskeleton          | RT |       | 27    | 2.3 | 1.70E-03 |
| Hypertrophic cardiomyopathy (HCM)         | RT |       | 14    | 1.2 | 2.80E-03 |
| Adherens junction                         | RT |       | 12    | 1   | 9.60E-03 |
| Cell adhesion molecules (CAMs)            | RT |       | 19    | 1.6 | 1.10E-02 |
| Glioma                                    | RT |       | 10    | 0.8 | 2.20E-02 |
| Chronic myeloid leukemia                  | RT |       | 11    | 0.9 | 2.50E-02 |
| NOD-like receptor signaling pathway       | RT |       | 9     | 0.8 | 4.70E-02 |
| Aldosterone-regulated sodium reabsorption | RT |       | 7     | 0.6 | 5.30E-02 |
| Non-small cell lung cancer                | RT |       | 8     | 0.7 | 5.90E-02 |
| Pathways in cancer                        | RT |       | 29    | 2.5 | 7.20E-02 |
| Cytokine-cytokine receptor interaction    | RT |       | 23    | 1.9 | 7.50E-02 |
| Dilated cardiomyopathy                    | RT |       | 11    | 0.9 | 7.50E-02 |
| ECM-receptor interaction                  | RT |       | 10    | 0.8 | 0.089    |
| extracellular matrix                      | RT |       | 32    | 2.7 | 1.20E-02 |
| proteinaceous extracellular matrix        | RT |       | 31    | 2.6 | 0.012    |

## Newborn mouse cells D7 vs D4

| Term                                              | RT | Genes | Count | %   | P-Value  |
|---------------------------------------------------|----|-------|-------|-----|----------|
| Lysosome                                          | RT |       | 40    | 1.5 | 6.60E-07 |
| Adherens junction                                 | RT |       | 24    | 0.9 | 4.90E-04 |
| Pentose phosphate pathway                         | RT |       | 12    | 0.4 | 7.00E-04 |
| Arginine and proline metabolism                   | RT |       | 18    | 0.7 | 1.30E-03 |
| MAPK signaling pathway                            | RT |       | 59    | 2.2 | 1.30E-03 |
| ABC transporters                                  | RT |       | 16    | 0.6 | 1.60E-03 |
| Toll-like receptor signaling pathway              | RT |       | 27    | 1   | 2.20E-03 |
| Glutathione metabolism                            | RT |       | 17    | 0.6 | 2.80E-03 |
| ErbB signaling pathway                            | RT |       | 24    | 0.9 | 3.60E-03 |
| Glycolysis / Gluconeogenesis                      | RT |       | 20    | 0.7 | 4.00E-03 |
| Aminoacyl-tRNA biosynthesis                       | RT |       | 14    | 0.5 | 6.50E-03 |
| Porphyryn and chlorophyll metabolism              | RT |       | 11    | 0.4 | 0.0093   |
| Oxidative Stress Induced Gene Expression Via Nrf2 | RT |       | 9     | 0.3 | 1.30E-02 |
| Keratinocyte Differentiation                      | RT |       | 14    | 0.5 | 0.017    |

|                         |    |  |   |     |          |
|-------------------------|----|--|---|-----|----------|
| CD40L Signaling Pathway | RT |  | 7 | 0.3 | 2.00E-02 |
| NF-kB Signaling Pathway | RT |  | 9 | 0.3 | 2.60E-02 |

#### Newborn mouse cells D10vs D7

| Term                             | RT | Genes | Count | %    | P-Value  |
|----------------------------------|----|-------|-------|------|----------|
| cornified envelope               | RT |       | 16    | 0.6  | 2.20E-10 |
| endomembrane system              | RT |       | 126   | 4.7  | 3.50E-10 |
| Golgi apparatus                  | RT |       | 149   | 5.5  | 2.10E-09 |
| nuclear envelope                 | RT |       | 46    | 1.7  | 2.50E-07 |
| extrinsic to membrane            | RT |       | 103   | 3.8  | 9.10E-07 |
| endosome                         | RT |       | 63    | 2.3  | 1.70E-06 |
| internal side of plasma membrane | RT |       | 68    | 2.5  | 4.80E-06 |
| plasma membrane                  | RT |       | 470   | 17.4 | 5.90E-06 |
| desmosome                        | RT |       | 12    | 0.4  | 1.50E-05 |
| nuclear pore                     | RT |       | 22    | 0.8  | 1.70E-05 |
| plasma membrane part             | RT |       | 277   | 10.2 | 3.40E-05 |
| Wnt signaling pathway            | RT |       | 40    | 1.5  | 1.20E-04 |
| Neurotrophin signaling pathway   | RT |       | 36    | 1.3  | 1.50E-04 |
| Ubiquitin mediated proteolysis   | RT |       | 37    | 1.4  | 1.70E-04 |
| Chronic myeloid leukemia         | RT |       | 24    | 0.9  | 3.30E-04 |
| Glioma                           | RT |       | 21    | 0.8  | 5.00E-04 |
| ECM-receptor interaction         | RT |       | 24    | 0.9  | 1.30E-03 |
| Lysosome                         | RT |       | 31    | 1.1  | 1.40E-03 |

**Table S2. Antibodies used in this study.**

| Antibody         | Isotype | Company    | Cat #    |
|------------------|---------|------------|----------|
| $\beta$ -catenin | Rabbit  | Sigma      | C2206    |
| Collagen I       | Rabbit  | Abcam      | ab34710  |
| Collagen IV      | Rabbit  | Abcam      | ab19808  |
| DSC2/3           | Mouse   | Santa Cruz | sc-53485 |
| DSG3             | Mouse   | MBL        | D218-3   |
| E-cadherin       | Rabbit  | Abcam      | ab15148  |
| Involucrin       | Rabbit  | Covance    | PRB-142C |

|            |        |                |            |
|------------|--------|----------------|------------|
| K10        | Mouse  | Santa Cruz     | sc-52318   |
| K14        | Mouse  | Santa Cruz     | sc-53072   |
| NCAM       | Rabbit | Chuong CM      | N/A        |
| P63        | Rabbit | Santa Cruz     | sc-8343    |
| P-cadherin | Goat   | Santa Cruz     | sc-1501    |
| PCNA       | Mouse  | Santa Cruz     | sc-56      |
| PDGFra     | Rat    | eBioscience    | 14-1401-82 |
| Vimentin   | Rabbit | Cell signaling | 5741S      |

**Table S3. Primers used in this study.**

| <b>Gene</b> | <b>Primer (5' to 3')</b>                   |
|-------------|--------------------------------------------|
| Col3a1-AS   | gTAATACGACTCACTATAGGGatccatcttgccatcttcg   |
| Col3a1-S    | atggacgcaatggagaaaag                       |
| Col6a1-AS   | CTAATACGACTCACTATAGGGgggcctggtagtttggtaca  |
| Col6a1-S    | tcgaaaccaccaaggctcttc                      |
| Ctsl-AS     | CTAATACGACTCACTATAGGGccttgcgtccatagcaacaga |
| Ctsl-S      | atgaggaattcaggcaggtg                       |
| Dcn-AS      | CTAATACGACTCACTATAGGGaagtcattttgcccaactgc  |
| Dcn-S       | aaaatgcccagaactctcca                       |
| Igfbp3-AS   | CTAATACGACTCACTATAGGGgtacgtcgtctttccccttg  |
| Igfbp3-S    | caggcagcctaagcacctac                       |
| Klk6-AS     | CTAATACGACTCACTATAGGGcggtgtaaactcctggcttc  |
| Klk6-S      | ccgaatctgcaggtgatctt                       |
| Klk7-AS     | CTAATACGACTCACTATAGGGccaccgttgtacttgcaga   |
| Klk7-S      | caagtacagctgggcagtga                       |
| Krt16-AS    | CTAATACGACTCACTATAGGGgaaggccagctcttctctga  |



|          |                                           |
|----------|-------------------------------------------|
| Krt16-S  | acctcctctcgcttctcctc                      |
| Krt17-AS | CTAATACGACTCACTATAGGGtgccatcctgaacttctcc  |
| Krt17-S  | gaaccacgaggaggagatga                      |
| Lamc2-AS | CTAATACGACTCACTATAGGGgtcgttctcttggtccttg  |
| Lamc2-S  | atgcctctgggaactgtgac                      |
| Lce1d-AS | CTAATACGACTCACTATAGGGagtccccagactgttgcta  |
| Lce1d-S  | atgtcctgccagcaaagc                        |
| Lce1e-AS | CTAATACGACTCACTATAGGGcagcagcagtccccagac   |
| Lce1e-S  | ctgtcagcagagccagca                        |
| Mmp13-AS | gTAATACGACTCACTATAGGGtgggccattgaaaaagtag  |
| Mmp13-S  | gccatttcattgcttctgat                      |
| Mmp14-AS | CTAATACGACTCACTATAGGGcgtcaaacaccagtgctta  |
| Mmp14-S  | ttgatggtgaaggagggttc                      |
| Spr1a-AS | CTAATACGACTCACTATAGGGctgctggtatggtgatggag |
| Spr1a-S  | atgagttcccaccagcagaa                      |
| Spr1b-AS | CTAATACGACTCACTATAGGGgctttgtcttctgttggcta |
| Spr1b-S  | tgagttcacatcagcagaagc                     |
| Spr2f-AS | CTAATACGACTCACTATAGGGgcatttctgctggaatgagg |
| Spr2f-S  | aagaacagcagtgcaagcaa                      |
| Tgfb1-AS | CTAATACGACTCACTATAGGGgagtctgccagctcatctcc |
| Tgfb1-S  | tgataagaggggacggtttg                      |
| Vegfa-AS | CTAATACGACTCACTATAGGGgcattcacatctgctgtgct |
| Vegfa-S  | ggtccagaaggagaggag                        |

**Table S4. Small molecule inhibitors and recombinant proteins used in this study.**

**Small molecule inhibitors**

| Catalog Number | Product Description                         | IC <sub>50</sub>                                                                                                                                                                                                                                                                       |
|----------------|---------------------------------------------|----------------------------------------------------------------------------------------------------------------------------------------------------------------------------------------------------------------------------------------------------------------------------------------|
| 121767         | AG 1024                                     | IC <sub>50</sub> = 7 mM for autophosphorylation of IGF-1R in intact cells                                                                                                                                                                                                              |
| 407248         | IGF-1R Inhibitor II                         | IC <sub>50</sub> = 12mM for inhibiting autophosphorylation of IGF-IR in MCF-7 cells<br>IC <sub>50</sub> <1 μM for IGF-R1                                                                                                                                                               |
| 230751         | Chromceptin IGF2 inhibitor                  | Blocks insulin-induced adipogenesis                                                                                                                                                                                                                                                    |
| 121790         | AGL 2043                                    | IC <sub>50</sub> = 800 nM for PDGFR in 3T3 cells<br>IC <sub>50</sub> = 90 nM against purified PDGFb-receptor                                                                                                                                                                           |
| 375670         | Herbimycin A, Streptomyces sp.              | IC <sub>50</sub> = 8 μg/ml for PDGF-induced phospholipase D activation                                                                                                                                                                                                                 |
| 521232         | PDGF Receptor Tyrosine Kinase Inhibitor III | IC <sub>50</sub> = 0.05 μM for α-PDGFR<br>IC <sub>50</sub> = 0.08 μM for β-PDGFR                                                                                                                                                                                                       |
| 440202         | LY 294002                                   | IC <sub>50</sub> = 1.4 mM for phosphatidylinositol 3-kinase                                                                                                                                                                                                                            |
| 676480         | VEGF Receptor 2 Kinase Inhibitor I          |                                                                                                                                                                                                                                                                                        |
| 676481         | VEGF Receptor Tyrosine Kinase Inhibitor II  | IC <sub>50</sub> = 20 nM, 180 nM and 240 nM for KDR, Flt-1 and c-Kit, respectively.                                                                                                                                                                                                    |
| 676483         | VEGFR Tyrosine Kinase Inhibitor IV          | IC <sub>50</sub> = 50 nM, 6.5 nM, and 15 nM for VEGFR-1, VEGFR-2, VEGFR-3, respectively.                                                                                                                                                                                               |
| 676487         | VEGF Receptor 2 Kinase Inhibitor III        | IC <sub>50</sub> = 1.04 μM and 20 μM for VEGF-R (KDR/Flk-1) and PDGF-R tyrosine kinases in NIH 3T3 cells overexpressing Flk-1<br>IC <sub>50</sub> = 50 nM, 5.3 μM and 30.5 μM for VEGF, bFGF, or ECGS, respectively.<br>IC <sub>50</sub> = 0.1 μM for ITD and FLT3 autophosphorylation |
| 100066         | NF-κB Activation Inhibitor V, 5HPP-33       | Blocks IL-1-induced NF-κB translocation.                                                                                                                                                                                                                                               |

|            |                                            |                                                                                                                                                                                          |
|------------|--------------------------------------------|------------------------------------------------------------------------------------------------------------------------------------------------------------------------------------------|
| 512732     | Parthenolide,<br>Tanacetum<br>parthenium   | NF- $\kappa$ B Activation Inhibitor; inhibits MAPK                                                                                                                                       |
| 03-34-0051 | Calpeptin                                  | Calpain inhibitor                                                                                                                                                                        |
| 218713     | Keratinocyte<br>Differentiation<br>Inducer | CKII inhibitor; keratinocyte differentiation inducer                                                                                                                                     |
| 616451     | TGF- $\beta$ RI Kinase<br>Inhibitor        | IC <sub>50</sub> = 51 nM for TGF- $\beta$ Receptor I kinase.<br>IC <sub>50</sub> = 89 nM for TGF- $\beta$ -dependent cellular growth<br>in NIH 3T3 mouse fibroblasts.                    |
| 616453     | TGF- $\beta$ RI Inhibitor III              | IC <sub>50</sub> = 129 nM for activin receptor-like kinase 4.<br>IC <sub>50</sub> = 47 nM for activin receptor-like kinase 5.<br>IC <sub>50</sub> = 10.6 $\mu$ M for p38 MAPK $\alpha$ . |
| 681665     | Wnt Agonist                                | Selective activator of Wnt signaling                                                                                                                                                     |
| 203696     | BPIQ-I                                     | IC <sub>50</sub> = 0.025 nM for EGFR                                                                                                                                                     |
| 324674     | EGFR Inhibitor                             | IC <sub>50</sub> = 21 nM, 63 nM, and 4 nM for EGFRwt,<br>EGFR <sup>L858R</sup> and EGFR <sup>L861Q</sup> , respectively                                                                  |
| 513040     | PD 174265 EGFR<br>inhibitor                | IC <sub>50</sub> = 0.0450 $\mu$ M for EGFR                                                                                                                                               |
| 658390     | AG 9                                       | IC <sub>50</sub> >1250 $\mu$ M for EGFR kinase                                                                                                                                           |
| 658552     | AG 1478                                    | IC <sub>50</sub> = 3 nM for EGFR kinase.                                                                                                                                                 |
| 688000     | ROCK Inhibitor, Y-<br>27632                | K <sub>i</sub> = 140 nM for p160Rock (ROCK-I)                                                                                                                                            |
| 527450     | PKR Inhibitor                              | IC <sub>50</sub> = 210 nM for RNA-induced PKR<br>autophosphorylation. IC <sub>50</sub><br>= 100 nM rescue PKR-dependent translation block.                                               |
| 371806     | GTP-14564                                  | IC <sub>50</sub> = 0.3 $\mu$ M for c-fms, c-kit, wt-FLT3 and ITD-<br>FLT3 <sup>1</sup><br>IC <sub>50</sub> = 1.0 $\mu$ M for PDGFR $\beta$                                               |
| 420129     | JNK Inhibitor V                            | IC <sub>50</sub> = 150 nM for hJNK1<br>IC <sub>50</sub> = 220 nM for hJNK2<br>IC <sub>50</sub> = 70 nM for hJNK3                                                                         |

|                                 |                              |                                                                                                    |
|---------------------------------|------------------------------|----------------------------------------------------------------------------------------------------|
| 420135                          | JNK Inhibitor VIII           | K <sub>i</sub> = 2nM for JNK1    K <sub>i</sub> = 4 nM for JNK2<br>K <sub>i</sub> = 52 nM for JNK3 |
| 203297                          | Bisindolylmaleimide IV       | IC <sub>50</sub> = 87 nM for PKC                                                                   |
| 203290                          | Bisindolylmaleimide I        | 10nM                                                                                               |
| 220285                          | Chelerythrine Chloride       | 660nM                                                                                              |
| SIGMA PZ0198                    | Prinomastat MMP inhibitor    | 50uM                                                                                               |
| APExBIO A4442                   | Way 170523 (MMP13 inhibitor) | 100uM                                                                                              |
| Phoenix Pharmaceuticals, 038-08 | Laminin binding inhibitor    | 10uM                                                                                               |

### Recombinant proteins

| Catalog number  | Protein | Concentration |
|-----------------|---------|---------------|
| MBS634420       | IGFBP3  | 0.5ug/ml      |
| R&D 792MG050    | IGF2    | 10ng/ml       |
| R&D 918MP010    | MMP14   | 10ng/ml       |
| MBS695709       | Vegf2   | 25ng/ml       |
| R&D 7196-WN-010 | Wnt3a   | 10ng/ml       |
| R&D 5036-WN-010 | Wnt10b  | 10ng/ml       |
